# Supplementary material for: DIP-2 suppresses ectopic neurite sprouting and axonal regeneration in mature neurons
Source: PubMed Central journal article supplement — J Cell Biol. 2019 Jan 7;218(1):125–33. doi: 10.1083/jcb.201804207 (PMC6314549; doi:10.1083/jcb.201804207), 2019-01-07
Supplement: JCB_201804207_sm.pdf [file JCB_201804207_sm.pdf]

Supplemental material

Noblett et al., <https://doi.org/10.1083/jcb.201804207>

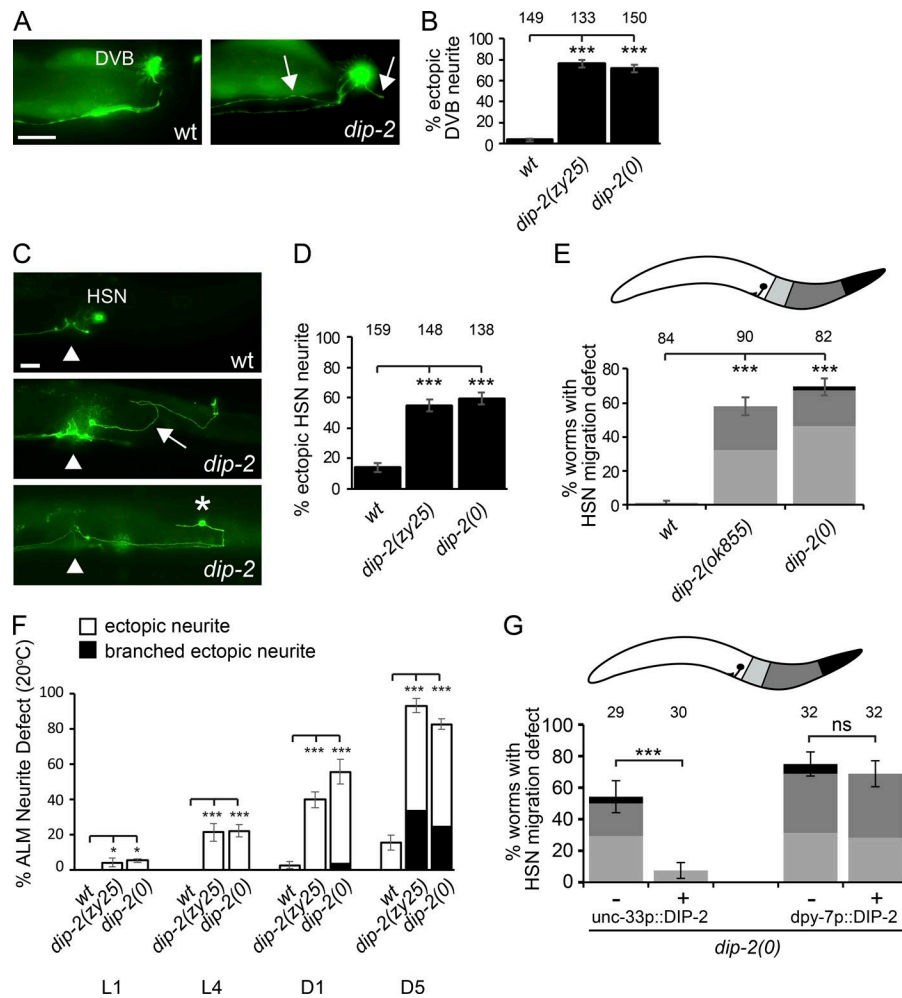

Figure S1. ***dip-2* mutants display neuronal morphology and migration defects.** (A–D) Images and quantification of DVB (A and B) and HSN (C and D) neuronal morphology defects in *dip-2* mutants. *dip-2* mutants display ectopic neurites (arrows) from cell bodies. (C and E) Images and quantification of HSN neuronal migration defects in *dip-2* mutants. In C, an asterisk marks a typical HSN neuron in a *dip-2* mutant that fails to migrate to its normal position adjacent to the vulva (arrowhead). (F) ALM neurons in *dip-2* mutants cultured at 20°C display a cumulative increase in ectopic neurite formation with increasing age. Neuronal morphology defects in *dip-2* mutants are temperature sensitive (compare with 25°C quantification in Fig. 2 B). (G) Neuron-specific expression of DIP-2 rescues neuronal migration defects in *dip-2* mutants. Bars, 20  $\mu$ m. Error bars in B and D indicate SEM of proportion with number of neurons ( $n = 133$ – $159$ ) above. Error bars in E and G indicate SEM of proportion for the entire stacked column with the number of animals ( $n = 29$ – $90$ ) above. Error bars in F indicate SD for data collected from three independent counts of 40–60 neurons. Significance compared with WT using one-way ANOVA with Tukey post hoc test (B, D, E, and F) or two-tailed  $t$  test (G). \*,  $P < 0.05$ ; \*\*\*,  $P < 0.001$ .

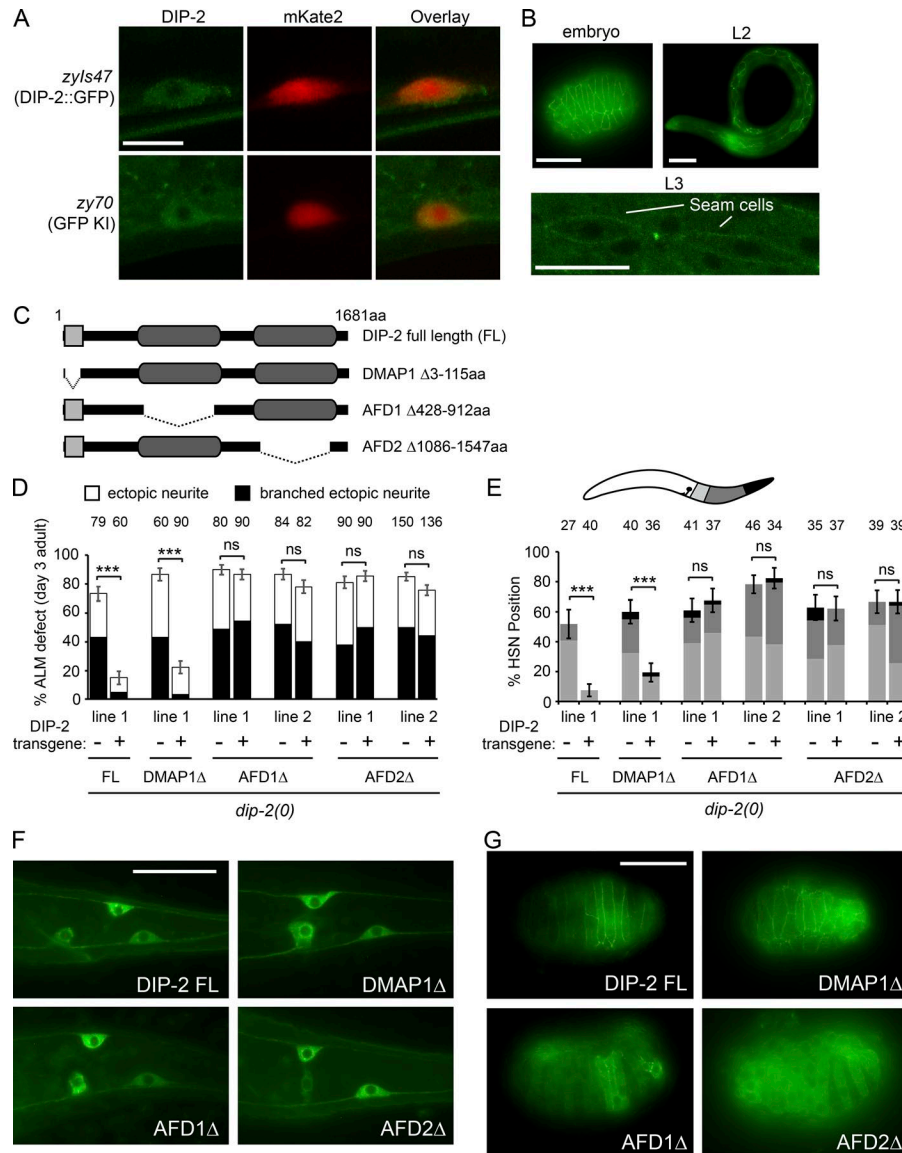

**Figure S2. Requirements for the DMAP1 binding and AFD domains for DIP-2 neuronal development and protein localization. (A and B)** Endogenous GFP::DIP-2 (*zy70*) shows cytoplasmic localization in mechanosensory neurons (A) and membrane localization in epidermal cells (B) indistinguishable from those expressed in transgenic (*zyEx78* and *zyls47*) animals. Shown are confocal images of PLM neurons marked by *Pmec-4-mKate2* (*juSi329*) in young adults (A) and L3 stage epidermal seam cells (B, bottom) and wide-field images of embryonic epidermal cells (B, top left) and L2 stage seam cells (B, top right). **(C)** Schematics of FL, DMAP1-binding, and AFD domain-deleted DIP-2 proteins. **(D and E)** ALM neuronal morphology and HSN migration defects in *dip-2* mutants were rescued with transgenes expressing FL and DMAP1-binding domain-deleted but not AFD-deleted DIP-2 proteins. Error bars indicate SEM of proportion with number of neurons ( $n = 60-150$ ; D) or animals ( $n = 27-46$ ; E) indicated above. Significance compared between transgene-negative and transgene-positive siblings using two-tailed *t* tests. \*\*\*,  $P < 0.001$ . **(F and G)** Representative images of *dip-2* promoter-driven FL DIP-2::GFP and domain-deleted DIP-2::GFP proteins expressed in L4-stage tail neurons and embryonic epidermal cells. FL and DMAP1 and AFD domain-deleted DIP-2::GFP proteins show similar localization patterns in late-stage neuronal cells. However, in contrast with FL and DMAP1-deleted DIP-2::GFP, AFD1- and AFD2-deleted DIP-2::GFP proteins displayed a partial or complete loss, respectively, of membrane localization in epidermal cells. Bars: 10  $\mu$ m (A); 20  $\mu$ m (B, F, and G).

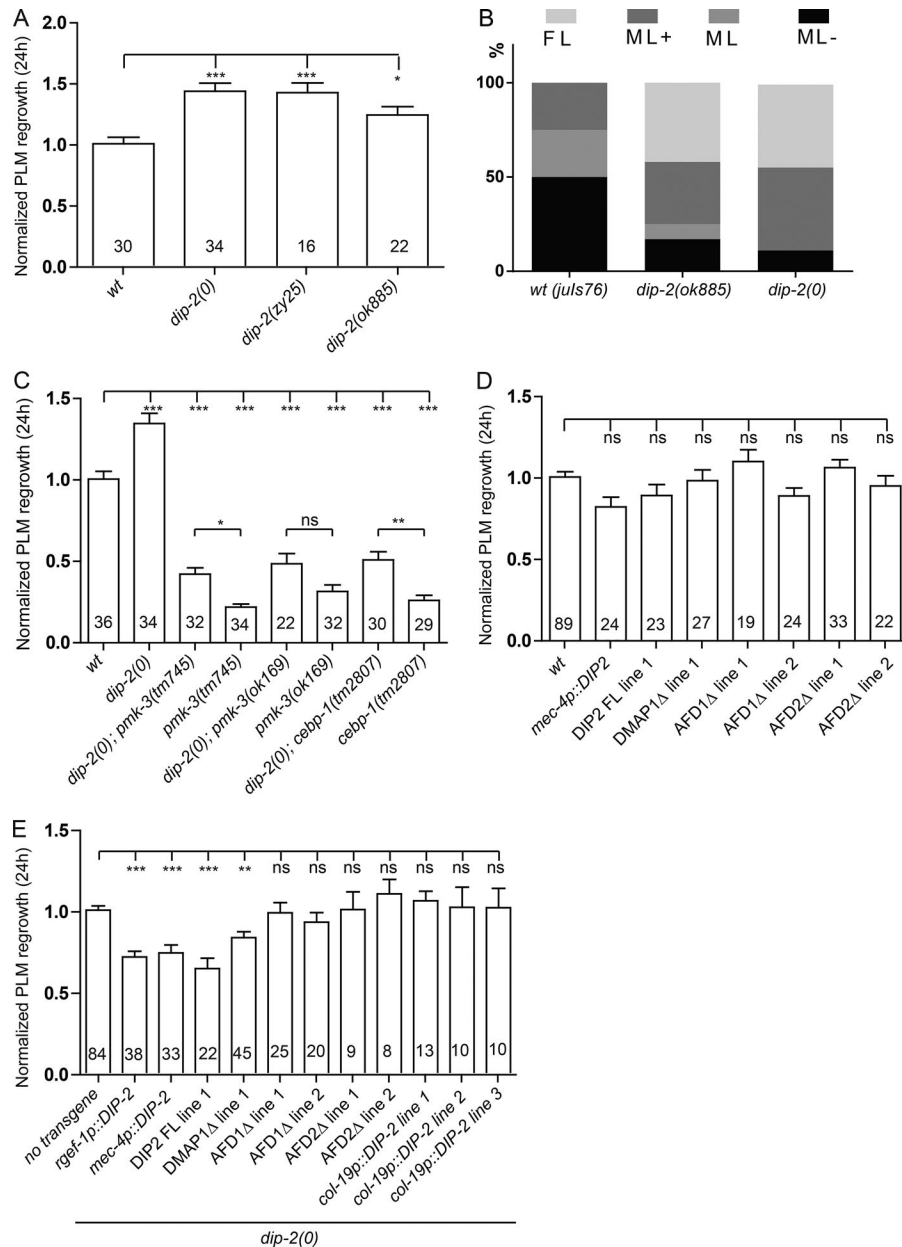

Figure S3. **Supporting evidence for *dip-2* in PLM axon regeneration.** (A) Multiple alleles of *dip-2* result in enhanced PLM regrowth; shown are normalized regrowth data >24 h after axotomy. (B) Loss of *dip-2* results in enhanced regrowth of D-type motor neurons. D-type neuron commissures were axotomized at mid-lateral (ML) position along dorsal-ventral axis, and regrowth was scored by the final position of regrowing tip of severed axon. FL, full regrowth to dorsal nerve cord; ML+, partial regrowth to above midlateral position along dorsal-ventral axis; ML, no regrowth; ML-, below midpoint, no regrowth. *n* = 8 for WT, 12 for *dip-2(ok885)*, and 9 for *dip-2(gk913988)*. (C) PLM regrowth analysis in double mutants of *dip-2* with *pmk-3*, *ceb-1*, consistent with *dip-2* acting in parallel to the DLK-1-PMK-3-CEBP-1 pathway. (D) DIP-2 transgenes do not affect PLM regrowth in a WT background. The graph shows normalized PLM regrowth 24 h after axotomy. *dip-2* transgenic lines are FL, DMAP1-binding, and AFD domain-deleted DIP-2 proteins (as indicated in Fig. S2). (E) PLM regrowth depends on AFD not DMAP1 binding domains. Same transgenic lines as in D in *dip-2(0)* background. Statistics for A and C-E, one-way ANOVA. \*, *P* < 0.05; \*\*, *P* < 0.01; \*\*\*, *P* < 0.001. Error bars are SEM.
